# Supplementary material for: A Worldwide Survey of Human Male Demographic History Based on Y-SNP and Y-STR Data from the HGDP–CEPH Populations
Source: PubMed Central journal article supplement — Mol Biol Evol. 2009 Oct 12;27(2):385–93. doi: 10.1093/molbev/msp243 (PMC2806244; doi:10.1093/molbev/msp243), 2009-10-12
Supplement: msp243_1.pdf [file msp243_1.pdf]

**Table S1: Posterior estimates of demographic parameters for 51 populations**

| Geographic Region                    | ID | Population           | No. of Males | TMRCA (KYA)         |                      |                       | Expansion time (KYA) |                     |                      | N posterior       |                    |                    | Population growth rate (%) |                     |                     |
|--------------------------------------|----|----------------------|--------------|---------------------|----------------------|-----------------------|----------------------|---------------------|----------------------|-------------------|--------------------|--------------------|----------------------------|---------------------|---------------------|
|                                      |    |                      |              | OMR                 | EMR                  | rEMR                  | OMR                  | EMR                 | rEMR                 | OMR               | EMR                | rEMR               | OMR                        | EMR                 | rEMR                |
| Sub-Saharan Africa (77 males)        | 1  | Bantu (South Africa) | 8            | 13.7<br>[9.7-19.9]  | 40.1<br>[28.2-59.2]  | 52.2<br>[35.8-79.1]   | 10.1<br>[2.8-26.4]   | 19.0<br>[6.4-50.1]  | 21.7<br>[6.4-64.8]   | 276<br>[102-764]  | 841<br>[311-2369]  | 1156<br>[426-3129] | 0.41<br>[0.06-1.25]        | 0.31<br>[0.06-1.08] | 0.26<br>[0.04-1.08] |
|                                      | 2  | Bantu (Kenya)        | 10           | 15.9<br>[11.0-23.7] | 47.7<br>[32.6-71.9]  | 63.0<br>[42.3-96.5]   | 9.0<br>[1.9-27.1]    | 21.2<br>[3.6-62.1]  | 25.1<br>[3.7-77.3]   | 268<br>[109-633]  | 899<br>[347-2218]  | 1144<br>[445-2833] | 0.29<br>[0.04-0.95]        | 0.17<br>[0.02-0.67] | 0.14<br>[0.02-0.63] |
|                                      | 3  | Mandenka             | 14           | 9.6<br>[7.0-13.4]   | 26.9<br>[19.6-37.9]  | 32.5<br>[23.2-46.4]   | 7.4<br>[2.9-18.6]    | 14.4<br>[7.0-32.3]  | 16.3<br>[7.8-38.1]   | 198<br>[72-530]   | 553<br>[212-1497]  | 655<br>[244-1779]  | 0.61<br>[0.11-1.62]        | 0.44<br>[0.12-1.05] | 0.39<br>[0.10-0.97] |
|                                      | 4  | Yoruba               | 10           | 4.3<br>[3.1-6.2]    | 13.9<br>[10.0-20.0]  | 16.7<br>[11.8-24.5]   | 4.9<br>[1.8-14.9]    | 10.1<br>[5.4-18.7]  | 11.7<br>[6.4-21.1]   | 139<br>[49-374]   | 283<br>[105-842]   | 328<br>[122-993]   | 0.67<br>[0.08-2.00]        | 0.76<br>[0.22-1.76] | 0.74<br>[0.22-1.70] |
|                                      | 5  | Biaka Pygmies        | 20           | 14.9<br>[11.2-20.4] | 45.1<br>[33.2-62.8]  | 58.5<br>[42.4-83.0]   | 10.3<br>[1.0-31.1]   | 21.6<br>[1.1-86.6]  | 25.3<br>[1.2-107.7]  | 299<br>[142-550]  | 1146<br>[525-2145] | 1428<br>[639-2660] | 0.14<br>[0.02-0.59]        | 0.06<br>[0.01-0.53] | 0.05<br>[0.01-0.52] |
|                                      | 6  | Mbuti Pygmies        | 11           | 12.3<br>[9.1-17.1]  | 37.1<br>[27.6-51.5]  | 48.8<br>[35.8-68.3]   | 10.8<br>[1.7-30.3]   | 27.0<br>[2.6-73.0]  | 33.6<br>[2.6-94.8]   | 297<br>[122-681]  | 999<br>[381-2380]  | 1298<br>[502-3020] | 0.22<br>[0.03-0.73]        | 0.11<br>[0.02-0.48] | 0.08<br>[0.01-0.47] |
|                                      | 7  | San                  | 4            | 26.6<br>[19.3-37.4] | 78.6<br>[57.2-109.8] | 117.4<br>[83.0-168.1] | 22.6<br>[10.0-41.9]  | 61.4<br>[32.0-93.9] | 81.2<br>[40.2-129.6] | 528<br>[176-1981] | 1471<br>[515-5381] | 2073<br>[741-6918] | 0.56<br>[0.10-1.56]        | 0.48<br>[0.11-1.48] | 0.45<br>[0.09-1.43] |
| Middle East/ North Africa (68 males) | 8  | Mozabite             | 20           | 12.1<br>[8.6-17.6]  | 34.4<br>[24.3-49.6]  | 42.5<br>[29.6-62.7]   | 5.1<br>[0.7-18.6]    | 7.2<br>[1.3-40.6]   | 7.4<br>[1.3-46.7]    | 175<br>[89-328]   | 594<br>[290-1134]  | 710<br>[353-1330]  | 0.24<br>[0.03-0.96]        | 0.20<br>[0.02-1.12] | 0.19<br>[0.02-1.11] |
|                                      | 9  | Bedouin              | 24           | 12.3<br>[8.8-17.8]  | 39.0<br>[27.8-56.4]  | 47.6<br>[33.6-70.5]   | 10.0<br>[1.5-27.7]   | 28.4<br>[1.8-77.8]  | 33.2<br>[1.8-90.8]   | 261<br>[111-510]  | 986<br>[398-2038]  | 1147<br>[471-2416] | 0.20<br>[0.03-0.61]        | 0.08<br>[0.01-0.42] | 0.07<br>[0.01-0.42] |
|                                      | 10 | Druze                | 11           | 9.9<br>[7.2-13.9]   | 30.9<br>[22.5-43.3]  | 38.9<br>[27.9-55.4]   | 8.5<br>[1.3-24.0]    | 22.1<br>[2.2-61.5]  | 26.0<br>[2.1-76.4]   | 226<br>[96-509]   | 785<br>[315-1850]  | 979<br>[397-2323]  | 0.24<br>[0.03-0.79]        | 0.11<br>[0.02-0.49] | 0.09<br>[0.01-0.48] |
|                                      | 11 | Palestinian          | 13           | 6.8<br>[4.7-9.9]    | 21.9<br>[15.2-31.9]  | 27.2<br>[18.5-40.3]   | 2.9<br>[0.4-11.4]    | 4.8<br>[0.7-28.6]   | 5.0<br>[0.7-33.4]    | 90<br>[48-180]    | 342<br>[177-688]   | 409<br>[210-827]   | 0.23<br>[0.03-0.92]        | 0.17<br>[0.02-0.96] | 0.16<br>[0.02-0.96] |
| Europe (84 males)                    | 12 | Orcadian             | 7            | 9.3<br>[6.6-13.3]   | 28.5<br>[20.5-40.6]  | 38.2<br>[26.8-55.7]   | 7.6<br>[1.6-22.5]    | 17.9<br>[3.5-46.9]  | 22.1<br>[3.9-60.4]   | 208<br>[80-563]   | 664<br>[244-1901]  | 880<br>[321-2512]  | 0.35<br>[0.05-1.14]        | 0.23<br>[0.03-0.84] | 0.19<br>[0.03-0.80] |
|                                      | 13 | Adygei               | 6            | 9.9<br>[7.0-14.1]   | 29.6<br>[21.1-42.3]  | 38.1<br>[26.6-55.9]   | 8.4<br>[2.2-24.0]    | 16.7<br>[5.4-43.6]  | 19.4<br>[6.3-52.1]   | 229<br>[84-674]   | 669<br>[243-2060]  | 854<br>[305-2646]  | 0.42<br>[0.06-1.32]        | 0.34<br>[0.06-1.18] | 0.33<br>[0.05-1.19] |
|                                      | 14 | Russian              | 16           | 12.2<br>[9.3-16.4]  | 36.1<br>[27.1-49.2]  | 42.8<br>[31.7-59.4]   | 10.6<br>[4.3-23.4]   | 28.2<br>[8.8-53.2]  | 32.7<br>[8.4-63.3]   | 262<br>[97-703]   | 766<br>[288-2295]  | 945<br>[353-2918]  | 0.48<br>[0.10-1.08]        | 0.21<br>[0.06-0.53] | 0.17<br>[0.05-0.52] |
|                                      | 15 | Basque               | 16           | 9.6<br>[6.7-13.8]   | 28.7<br>[20.2-41.6]  | 36.3<br>[25.4-53.1]   | 6.0<br>[1.4-18.4]    | 7.0<br>[3.3-27.3]   | 7.5<br>[3.6-30.3]    | 193<br>[79-419]   | 589<br>[255-1320]  | 717<br>[320-1577]  | 0.42<br>[0.06-1.47]        | 0.64<br>[0.09-1.79] | 0.65<br>[0.09-1.75] |
|                                      | 16 | French               | 10           | 8.5<br>[8.5-11.5]   | 27.6<br>[20.4-38.0]  | 36.7<br>[26.6-51.2]   | 8.5<br>[2.4-22.5]    | 21.4<br>[4.5-47.9]  | 26.4<br>[5.0-61.2]   | 221<br>[83-578]   | 751<br>[263-2132]  | 1005<br>[343-2736] | 0.43<br>[0.06-1.16]        | 0.23<br>[0.05-1.02] | 0.20<br>[0.04-1.06] |
|                                      | 17 | North Italian        | 7            | 10.5<br>[7.5-15.1]  | 30.4<br>[21.8-43.1]  | 38.7<br>[27.1-56.3]   | 8.9<br>[2.4-24.4]    | 17.5<br>[5.5-44.1]  | 19.0<br>[6.1-53.5]   | 245<br>[89-711]   | 713<br>[252-2073]  | 905<br>[322-2658]  | 0.42<br>[0.06-1.26]        | 0.33<br>[0.06-1.29] | 0.31<br>[0.05-1.30] |
|                                      | 18 | Sardinian            | 16           | 11.8<br>[8.8-16.5]  | 35.1<br>[25.6-49.2]  | 43.6<br>[31.2-62.4]   | 10.2<br>[2.5-26.2]   | 24.1<br>[5.2-57.9]  | 27.5<br>[5.4-70.0]   | 274<br>[103-649]  | 866<br>[316-2179]  | 1108<br>[397-2673] | 0.33<br>[0.05-0.94]        | 0.17<br>[0.03-0.65] | 0.14<br>[0.03-0.62] |
|                                      | 19 | Tuscan               | 6            | 10.4<br>[7.7-14.4]  | 32.6<br>[24.0-45.4]  | 42.0<br>[30.3-59.9]   | 10.4<br>[4.5-24.7]   | 27.1<br>[12.8-45.2] | 34.5<br>[15.6-57.1]  | 259<br>[87-830]   | 666<br>[236-2265]  | 831<br>[298-2818]  | 0.61<br>[0.09-1.58]        | 0.41<br>[0.11-1.03] | 0.34<br>[0.10-0.90] |
| Central/ South Asia (170 males)      | 20 | Balochi              | 23           | 10.5<br>[8.2-14.0]  | 31.1<br>[23.6-42.0]  | 40.2<br>[29.9-55.0]   | 9.9<br>[5.0-19.2]    | 26.6<br>[12.1-46.0] | 33.6<br>[13.6-58.3]  | 216<br>[82-593]   | 652<br>[256-1878]  | 857<br>[332-2622]  | 0.59<br>[0.16-1.15]        | 0.23<br>[0.09-0.45] | 0.18<br>[0.07-0.37] |
|                                      | 21 | Brahui               | 24           | 11.3<br>[8.6-15.6]  | 32.9<br>[24.8-44.9]  | 40.8<br>[30.4-56.7]   | 11.7<br>[6.1-26.9]   | 32.5<br>[18.6-63.6] | 39.6<br>[22.1-76.8]  | 288<br>[110-741]  | 845<br>[336-2304]  | 1037<br>[406-2725] | 0.41<br>[0.08-0.87]        | 0.15<br>[0.04-0.30] | 0.13<br>[0.04-0.25] |
|                                      | 22 | Makrani              | 20           | 14.0<br>[10.6-19.3] | 36.3<br>[26.8-51.3]  | 45.8<br>[33.2-65.6]   | 11.3<br>[5.6-20.5]   | 25.3<br>[10.3-43.8] | 30.9<br>[12.0-55.3]  | 247<br>[98-692]   | 705<br>[266-2043]  | 903<br>[338-2550]  | 0.62<br>[0.21-1.23]        | 0.29<br>[0.12-0.69] | 0.23<br>[0.10-0.62] |
|                                      | 23 | Sindhi               | 19           | 10.8<br>[8.3-14.2]  | 29.2<br>[22.3-38.9]  | 35.9<br>[27.1-48.5]   | 9.9<br>[4.5-18.8]    | 22.9<br>[6.8-40.6]  | 25.4<br>[7.1-48.5]   | 236<br>[89-659]   | 733<br>[249-2269]  | 1013<br>[337-2893] | 0.64<br>[0.18-1.31]        | 0.30<br>[0.11-1.12] | 0.26<br>[0.09-1.17] |
|                                      | 24 | Pathan               | 19           | 11.6<br>[9.0-15.5]  | 33.3<br>[25.1-44.9]  | 40.0<br>[29.7-54.8]   | 10.9<br>[5.1-24.2]   | 28.4<br>[13.5-52.7] | 34.2<br>[16.3-62.9]  | 271<br>[103-723]  | 742<br>[288-2158]  | 863<br>[335-2512]  | 0.47<br>[0.10-1.01]        | 0.20<br>[0.06-0.40] | 0.17<br>[0.05-0.34] |
|                                      | 25 | Burusho              | 19           | 11.1<br>[8.6-14.6]  | 34.1<br>[26.2-45.7]  | 42.0<br>[31.5-57.0]   | 11.9<br>[5.0-29.4]   | 33.9<br>[14.8-68.0] | 41.9<br>[17.2-86.0]  | 307<br>[115-782]  | 915<br>[346-2566]  | 1138<br>[449-3108] | 0.36<br>[0.06-0.83]        | 0.14<br>[0.04-0.30] | 0.11<br>[0.03-0.24] |

| Region                   |            | Group              |                    | Genetic Diversity   |                     |                     | Cultural Heritage  |                     |                     | Economic Indicators |                   |                     | Social Metrics      |                     |                     |
|--------------------------|------------|--------------------|--------------------|---------------------|---------------------|---------------------|--------------------|---------------------|---------------------|---------------------|-------------------|---------------------|---------------------|---------------------|---------------------|
| ID                       | Sub-Region | Population         | Language           | Y1                  | Y2                  | Y3                  | Y4                 | Y5                  | Y6                  | Y7                  | Y8                | Y9                  | Y10                 | Y11                 | Y12                 |
| Central/<br>South Asia   | 26         | Hazara             | 20                 | 9.2<br>[6.9-12.5]   | 27.9<br>[20.8-38.4] | 35.9<br>[26.4-50.3] | 8.0<br>[0.8-23.0]  | 21.7<br>[0.9-65.3]  | 26.4<br>[0.9-82.8]  | 208<br>[101-385]    | 780<br>[347-1484] | 1000<br>[449-1917]  | 0.16<br>[0.02-0.57] | 0.06<br>[0.01-0.45] | 0.05<br>[0.01-0.47] |
|                          | 27         | Uyгур              | 8                  | 11.6<br>[8.6-16.3]  | 33.6<br>[24.7-47.2] | 40.6<br>[29.2-58.2] | 10.1<br>[4.8-21.5] | 24.9<br>[12.4-42.1] | 29.2<br>[13.8-50.7] | 238<br>[86-737]     | 665<br>[238-2133] | 796<br>[287-2624]   | 0.69<br>[0.13-1.62] | 0.40<br>[0.13-1.04] | 0.36<br>[0.11-1.00] |
|                          | 28         | Kalash             | 18                 | 9.6<br>[7.2-13.2]   | 29.6<br>[22.1-40.9] | 38.8<br>[28.2-54.5] | 9.0<br>[1.0-25.9]  | 24.3<br>[1.2-72.4]  | 30.2<br>[1.2-90.7]  | 237<br>[110-448]    | 871<br>[368-1735] | 1124<br>[479-2227]  | 0.16<br>[0.02-0.58] | 0.07<br>[0.01-0.42] | 0.05<br>[0.01-0.44] |
| East Asia<br>(155 males) | 29         | Oroqen             | 5                  | 13.2<br>[8.8-20.4]  | 37.9<br>[26.2-56.9] | 47.0<br>[31.7-72.8] | 9.2<br>[2.0-28.0]  | 19.7<br>[4.7-53.1]  | 22.7<br>[5.3-63.7]  | 263<br>[98-840]     | 789<br>[288-2549] | 985<br>[349-3042]   | 0.36<br>[0.05-1.21] | 0.28<br>[0.04-1.02] | 0.26<br>[0.04-0.98] |
|                          | 30         | Naxi               | 7                  | 8.2<br>[5.8-11.5]   | 26.0<br>[18.6-36.7] | 33.2<br>[23.5-47.6] | 7.7<br>[1.3-23.1]  | 19.6<br>[2.4-52.9]  | 24.0<br>[2.5-66.1]  | 208<br>[84-551]     | 690<br>[261-1878] | 880<br>[328-2422]   | 0.30<br>[0.04-0.97] | 0.17<br>[0.02-0.67] | 0.14<br>[0.02-0.67] |
|                          | 31         | Dai                | 6                  | 11.5<br>[8.2-16.6]  | 33.6<br>[24.0-48.2] | 42.3<br>[29.6-62.0] | 9.5<br>[2.4-26.4]  | 20.8<br>[5.8-49.7]  | 24.2<br>[6.1-59.6]  | 257<br>[94-772]     | 756<br>[266-2386] | 971<br>[333-2918]   | 0.40<br>[0.05-1.23] | 0.30<br>[0.05-1.05] | 0.26<br>[0.05-1.02] |
|                          | 32         | MiaoꞀu             | 7                  | 8.0<br>[5.4-12.0]   | 26.7<br>[18.2-40.0] | 34.5<br>[23.0-53.3] | 5.9<br>[1.1-18.3]  | 13.8<br>[2.2-42.5]  | 16.1<br>[2.4-51.7]  | 159<br>[65-412]     | 542<br>[215-1471] | 692<br>[272-1892]   | 0.33<br>[0.04-1.10] | 0.21<br>[0.03-0.77] | 0.18<br>[0.03-0.72] |
|                          | 33         | Daur               | 6                  | 13.0<br>[9.2-18.9]  | 37.9<br>[27.0-54.4] | 46.9<br>[33.0-68.5] | 9.7<br>[3.0-26.8]  | 22.3<br>[7.8-48.8]  | 27.3<br>[9.0-58.7]  | 267<br>[96-828]     | 739<br>[267-2389] | 912<br>[324-2926]   | 0.45<br>[0.06-1.36] | 0.33<br>[0.06-0.92] | 0.28<br>[0.05-0.85] |
|                          | 34         | She                | 7                  | 5.9<br>[4.1-8.7]    | 20.1<br>[14.2-29.3] | 24.6<br>[16.8-37.0] | 5.5<br>[1.0-17.0]  | 14.4<br>[2.3-39.9]  | 17.0<br>[2.5-46.8]  | 141<br>[59-371]     | 491<br>[187-1336] | 589<br>[224-1621]   | 0.33<br>[0.04-1.10] | 0.20<br>[0.03-0.69] | 0.18<br>[0.03-0.64] |
|                          | 35         | Han                | 23                 | 11.2<br>[8.5-15.3]  | 31.0<br>[23.2-43.1] | 36.4<br>[26.8-51.0] | 8.9<br>[5.6-13.5]  | 21.6<br>[12.5-33.4] | 24.7<br>[13.4-39.2] | 172<br>[66-465]     | 556<br>[214-1563] | 659<br>[244-1902]   | 1.14<br>[0.58-1.94] | 0.47<br>[0.25-0.90] | 0.41<br>[0.22-0.84] |
|                          | 36         | Hezhen             | 5                  | 11.5<br>[8.2-16.5]  | 35.4<br>[25.6-50.0] | 44.8<br>[31.8-64.9] | 9.9<br>[4.1-25.1]  | 24.0<br>[13.1-41.6] | 29.5<br>[16.3-49.4] | 263<br>[87-927]     | 662<br>[239-2303] | 805<br>[292-2697]   | 0.61<br>[0.08-1.74] | 0.57<br>[0.13-1.57] | 0.55<br>[0.13-1.51] |
|                          | 37         | Lahu               | 7                  | 9.9<br>[6.6-15.3]   | 31.3<br>[21.1-47.4] | 36.7<br>[24.2-56.8] | 4.2<br>[0.6-15.8]  | 8.4<br>[1.1-38.3]   | 9.3<br>[1.2-43.9]   | 124<br>[57-319]     | 455<br>[202-1167] | 535<br>[236-1382]   | 0.27<br>[0.04-0.99] | 0.18<br>[0.02-0.88] | 0.17<br>[0.02-0.86] |
|                          | 38         | Mongolia           | 7                  | 12.8<br>[9.5-17.5]  | 38.0<br>[28.5-52.1] | 46.9<br>[34.1-65.7] | 11.5<br>[4.8-25.6] | 29.8<br>[11.6-53.1] | 36.4<br>[13.3-64.7] | 282<br>[99-913]     | 845<br>[303-2784] | 1011<br>[351-3320]  | 0.56<br>[0.09-1.40] | 0.31<br>[0.08-0.87] | 0.27<br>[0.07-0.81] |
|                          | 39         | Tu                 | 7                  | 8.9<br>[6.4-12.6]   | 27.6<br>[19.8-39.4] | 35.7<br>[25.3-51.8] | 8.3<br>[1.8-23.4]  | 19.8<br>[3.6-51.9]  | 24.1<br>[4.0-63.2]  | 218<br>[84-588]     | 702<br>[255-2003] | 892<br>[327-2569]   | 0.34<br>[0.05-1.07] | 0.20<br>[0.03-0.75] | 0.17<br>[0.03-0.69] |
|                          | 40         | Yizu               | 9                  | 11.8<br>[8.6-16.8]  | 36.1<br>[26.0-51.3] | 45.4<br>[32.3-65.9] | 9.2<br>[2.9-23.6]  | 17.0<br>[6.1-45.1]  | 18.9<br>[6.6-54.2]  | 247<br>[92-685]     | 809<br>[302-2201] | 1035<br>[368-2769]  | 0.46<br>[0.07-1.32] | 0.35<br>[0.07-1.34] | 0.32<br>[0.06-1.34] |
|                          | 41         | Tujia              | 9                  | 10.3<br>[7.5-14.7]  | 30.4<br>[22.0-43.0] | 36.1<br>[25.8-52.2] | 8.4<br>[3.9-19.4]  | 19.3<br>[10.5-35.3] | 22.3<br>[12.1-41.2] | 212<br>[75-628]     | 559<br>[214-1657] | 683<br>[259-2003]   | 0.70<br>[0.12-1.75] | 0.47<br>[0.14-1.10] | 0.42<br>[0.12-1.01] |
|                          | 42         | Xibe               | 8                  | 14.3<br>[10.7-19.7] | 43.1<br>[31.9-59.6] | 52.3<br>[38.2-73.8] | 11.7<br>[6.1-23.2] | 30.2<br>[16.5-49.4] | 36.9<br>[19.1-60.8] | 274<br>[98-895]     | 746<br>[288-2370] | 922<br>[340-3021]   | 0.69<br>[0.15-1.58] | 0.39<br>[0.13-1.01] | 0.33<br>[0.11-0.87] |
|                          | 43         | Cambodian          | 6                  | 11.0<br>[7.8-15.8]  | 32.0<br>[22.9-45.3] | 42.9<br>[30.1-62.6] | 9.6<br>[2.4-26.8]  | 20.7<br>[5.2-50.1]  | 25.0<br>[6.0-64.4]  | 261<br>[96-768]     | 772<br>[276-2295] | 1029<br>[362-3148]  | 0.40<br>[0.05-1.22] | 0.28<br>[0.05-1.04] | 0.24<br>[0.04-1.03] |
| 44                       | Japanese   | 18                 | 12.2<br>[9.2-16.5] | 35.9<br>[26.9-49.3] | 43.4<br>[31.9-60.5] | 9.0<br>[4.4-17.9]   | 19.8<br>[9.9-38.1] | 24.0<br>[11.2-46.9] | 211<br>[78-602]     | 692<br>[262-1840]   | 822<br>[314-2233] | 0.72<br>[0.19-1.53] | 0.36<br>[0.13-0.82] | 0.30<br>[0.11-0.73] |                     |
| 45                       | Yakut      | 18                 | 9.7<br>[6.5-14.9]  | 29.8<br>[20.1-44.3] | 36.4<br>[24.1-56.0] | 1.7<br>[0.2-7.2]    | 3.4<br>[0.5-16.5]  | 3.7<br>[0.5-19.4]   | 59<br>[33-109]      | 218<br>[119-409]    | 259<br>[141-487]  | 0.26<br>[0.03-1.02] | 0.20<br>[0.02-0.91] | 0.19<br>[0.02-0.92] |                     |
| Oceania<br>(16 males)    | 46         | Melanesian         | 4                  | 8.2<br>[5.3-13.0]   | 24.0<br>[15.7-37.4] | 29.5<br>[18.8-46.8] | 5.4<br>[0.8-20.8]  | 9.5<br>[2.0-38.7]   | 10.3<br>[2.3-42.7]  | 151<br>[55-575]     | 447<br>[164-1609] | 527<br>[192-1848]   | 0.32<br>[0.04-1.17] | 0.30<br>[0.03-1.23] | 0.30<br>[0.04-1.24] |
|                          | 47         | Papuan             | 12                 | 15.2<br>[10.8-21.7] | 38.5<br>[27.7-54.9] | 46.6<br>[33.1-67.6] | 9.8<br>[3.2-25.3]  | 17.6<br>[7.4-46.7]  | 20.0<br>[8.6-54.1]  | 283<br>[106-716]    | 810<br>[306-2046] | 947<br>[362-2385]   | 0.43<br>[0.07-1.25] | 0.30<br>[0.06-0.92] | 0.27<br>[0.06-0.83] |
| America<br>(20 males)    | 48         | Karitiana          | 4                  | 3.3<br>[2.0-5.6]    | 10.8<br>[6.6-17.9]  | 13.2<br>[7.8-22.2]  | 2.2<br>[0.3-10.2]  | 4.7<br>[0.6-21.8]   | 5.4<br>[0.7-24.5]   | 53<br>[18-228]      | 178<br>[62-677]   | 210<br>[73-794]     | 0.32<br>[0.04-1.12] | 0.25<br>[0.03-0.97] | 0.23<br>[0.03-0.93] |
|                          | 49         | Surui              | 4                  | 4.2<br>[2.6-6.9]    | 15.6<br>[9.5-25.8]  | 18.4<br>[11.0-31.1] | 2.5<br>[0.3-11.6]  | 5.8<br>[0.7-27.3]   | 6.3<br>[0.7-30.8]   | 63<br>[21-250]      | 237<br>[83-894]   | 275<br>[95-1017]    | 0.31<br>[0.04-1.10] | 0.22<br>[0.03-0.87] | 0.21<br>[0.03-0.87] |
|                          | 50         | Colombian<br>&Maya | 4                  | 4.2<br>[2.8-6.4]    | 13.6<br>[9.3-20.2]  | 17.2<br>[11.6-25.9] | 5.6<br>[1.3-20.6]  | 12.4<br>[5.0-27.4]  | 15.0<br>[6.6-29.9]  | 161<br>[56-608]     | 363<br>[121-1408] | 423<br>[140-1608]   | 0.43<br>[0.05-1.51] | 0.60<br>[0.09-1.67] | 0.61<br>[0.10-1.65] |
|                          | 51         | Pima               | 8                  | 10.2<br>[6.8-15.5]  | 28.5<br>[19.4-42.9] | 34.9<br>[23.1-53.7] | 6.0<br>[1.1-19.0]  | 12.8<br>[2.2-40.1]  | 14.2<br>[2.3-45.5]  | 169<br>[73-416]     | 514<br>[208-1334] | 613<br>[247-1586]   | 0.31<br>[0.04-1.07] | 0.22<br>[0.03-0.78] | 0.20<br>[0.03-0.74] |

**Table S2: Summary of mutations reported in the literature for 54 simple and 11 complex Y-STRs used to generate the observed mutation rates**

| Simple Y-STRs |                  |                |                 | Simple Y-STRs |                  |                |                  | Simple Y-STRs  |                  |                |                  |
|---------------|------------------|----------------|-----------------|---------------|------------------|----------------|------------------|----------------|------------------|----------------|------------------|
| Locus         | No. of mutations | No. of meioses | BATWING muprior | Locus         | No. of mutations | No. of meioses | BATWING muprior  | Locus          | No. of mutations | No. of meioses | BATWING muprior  |
| DYS472        | 0                | 403            | gamma (1, 404)  | DYS495        | 0                | 403            | gamma (1, 404)   | DYS540         | 0                | 403            | gamma (1, 404)   |
| DYS476        | 0                | 403            | gamma (1, 404)  | DYS497        | 1                | 403            | gamma (1, 404)   | DYS549         | 1                | 555            | gamma (1, 556)   |
| DYS480        | 0                | 403            | gamma (1, 404)  | DYS505        | 0                | 403            | gamma (1, 404)   | DYS554         | 1                | 403            | gamma (1, 404)   |
| DYS481        | 3                | 403            | gamma (3, 404)  | DYS508        | 2                | 403            | gamma (2, 404)   | DYS556         | 0                | 403            | gamma (1, 404)   |
| DYS485        | 1                | 403            | gamma (1, 404)  | DYS511        | 1                | 403            | gamma (1, 404)   | DYS565         | 2                | 403            | gamma (2, 404)   |
| DYS487        | 1                | 403            | gamma (1, 404)  | DYS522        | 0                | 555            | gamma (1, 556)   | DYS567         | 0                | 403            | gamma (1, 404)   |
| DYS488        | 0                | 403            | gamma (1, 404)  | DYS525        | 0                | 403            | gamma (1, 404)   | DYS568         | 0                | 403            | gamma (1, 404)   |
| DYS490        | 0                | 403            | gamma (1, 404)  | DYS530        | 0                | 403            | gamma (1, 404)   | DYS569         | 0                | 403            | gamma (1, 404)   |
| DYS491        | 0                | 403            | gamma (1, 404)  | DYS531        | 0                | 483            | gamma (1, 484)   | DYS570         | 7                | 555            | gamma (7, 556)   |
| DYS492        | 0                | 403            | gamma (1, 404)  | DYS533        | 2                | 555            | gamma (2, 556)   | DYS572         | 1                | 403            | gamma (1, 404)   |
| DYS494        | 0                | 403            | gamma (1, 404)  | DYS537        | 0                | 403            | gamma (1, 404)   | DYS573         | 2                | 403            | gamma (2, 404)   |
| Simple Y-STRs |                  |                |                 | Simple Y-STRs |                  |                |                  | Complex Y-STRs |                  |                |                  |
| Locus         | No. of mutations | No. of meioses | BATWING muprior | Locus         | No. of mutations | No. of meioses | BATWING muprior  | Locus          | No. of mutations | No. of meioses | BATWING muprior  |
| DYS575        | 1                | 403            | gamma (1, 404)  | DYS636        | 1                | 403            | gamma (1, 404)   | DYS391         | 25               | 9279           | gamma (25, 9280) |
| DYS576        | 9                | 555            | gamma (9, 556)  | DYS638        | 1                | 403            | gamma (1, 404)   | DYS437         | 6                | 4381           | gamma (6, 4382)  |
| DYS578        | 0                | 403            | gamma (1, 404)  | DYS640        | 2                | 403            | gamma (2, 404)   | GATA_H4        | 11               | 2083           | gamma (11, 2084) |
| DYS579        | 0                | 403            | gamma (1, 404)  | DYS641        | 0                | 403            | gamma (1, 404)   | DYS389CD       | 28               | 7842           | gamma (28, 7843) |
| DYS580        | 0                | 403            | gamma (1, 404)  | DYS643        | 0                | 555            | gamma (1, 556)   | DYS389AB       | 20               | 7864           | gamma (20, 7865) |
| DYS583        | 0                | 403            | gamma (1, 404)  | DYS393        | 6                | 7835           | gamma (6, 7835)  | DYS19          | 23               | 9840           | gamma (23, 9841) |
| DYS589        | 0                | 403            | gamma (1, 404)  | DYS438        | 2                | 4565           | gamma (2, 4566)  | DYS448         | 1                | 1213           | gamma (1, 1214)  |
| DYS590        | 0                | 403            | gamma (1, 404)  | DYS456        | 8                | 1243           | gamma (8, 1244)  | DYS390         | 22               | 9340           | gamma (22, 9341) |
| DYS594        | 0                | 403            | gamma (1, 404)  | DYS458        | 13               | 1243           | gamma (13, 1244) | DYS635         | 12               | 1920           | gamma (12, 1921) |
| DYS617        | 0                | 403            | gamma (1, 404)  | DYS388        | 1                | 2394           | gamma (1, 2395)  | DYS439         | 28               | 4542           | gamma (28, 4543) |
| DYS618        | 0                | 403            | gamma (1, 404)  |               |                  |                |                  | DYS392         | 5                | 9264           | gamma (5, 9265)  |

**Table S3:****Subsets of 11 simple or complex Y-STRs with similar average repeat number variance**

| Simple STRs<br>Subset 1 | DYS456 | DYS618 | DYS568  | DYS531   | DYS565   | DYS393 | DYS438 | DYS508 | DYS505 | DYS576 | DYS570 | Average<br>Variance |
|-------------------------|--------|--------|---------|----------|----------|--------|--------|--------|--------|--------|--------|---------------------|
| Variance                | 1.14   | 0.59   | 0.97    | 0.96     | 0.26     | 0.92   | 0.50   | 0.97   | 0.76   | 2.17   | 2.37   | 1.06                |
| Simple STRs<br>Subset 2 | DYS540 | DYS554 | DYS533  | DYS487   | DYS456   | DYS485 | DYS495 | DYS481 | DYS576 | DYS505 | DYS575 |                     |
| Variance                | 0.38   | 0.30   | 0.64    | 0.72     | 1.14     | 1.36   | 1.25   | 2.48   | 2.17   | 0.76   | 0.29   | 1.04                |
| Complex<br>STRs         | DYS391 | DYS437 | GATA_H4 | DYS389CD | DYS389AB | DYS19  | DYS448 | DYS390 | DYS635 | DYS439 | DYS392 |                     |
| Variance                | 0.39   | 0.30   | 0.66    | 0.70     | 1.08     | 1.41   | 1.17   | 2.69   | 2.14   | 0.72   | 0.24   | 1.05                |

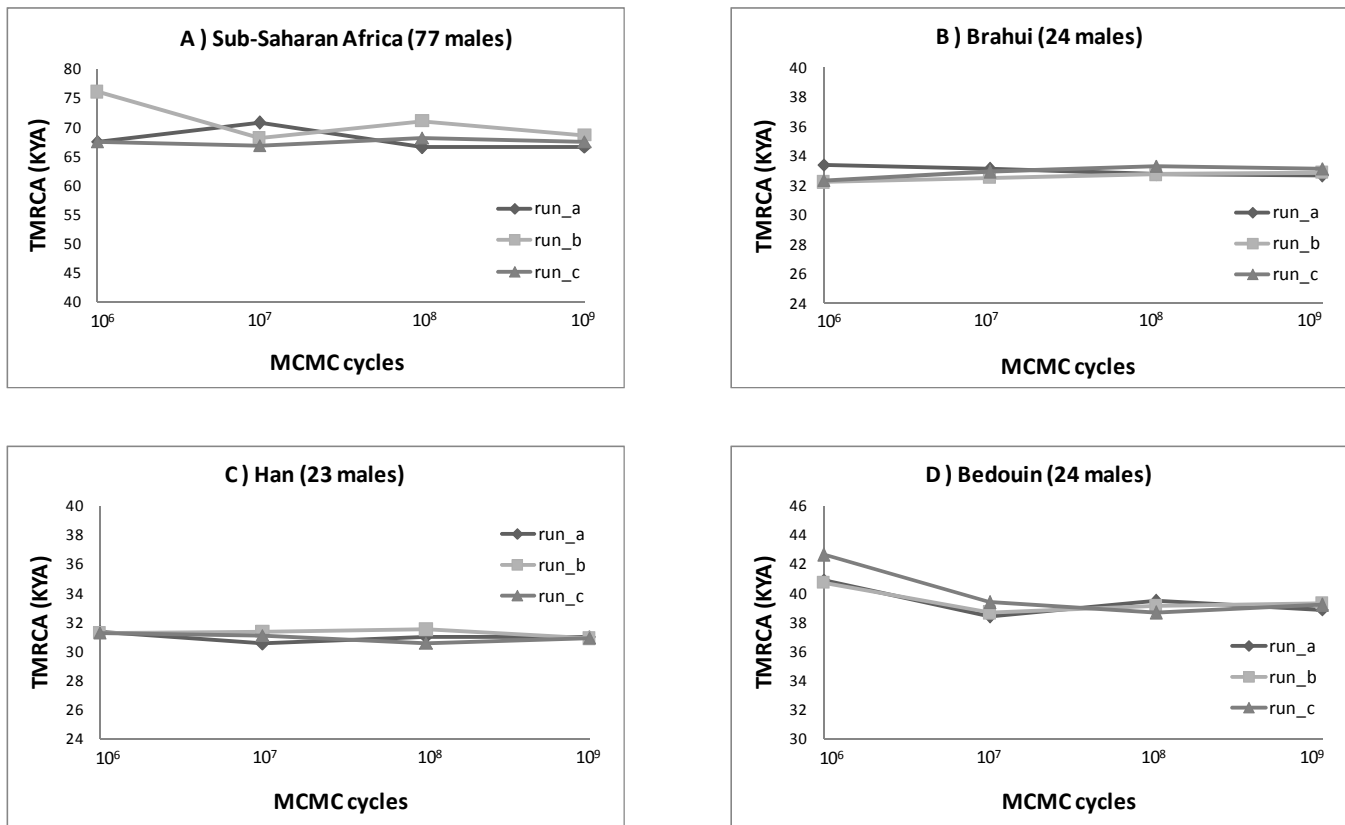

Figure S1: Program convergence confirmation. For each population, we ran the program three times for four different numbers of MCMC cycles, 1 million, 10 million, 100 million and 1000 million. A total of  $10^4$  samples of the program's output were taken after discarding the first  $3 \times 10^3$  samples as "burn-in", and convergence was confirmed by examining the median estimates of longer runs and finding the same posterior: all runs have converged by  $10^7$  cycles.

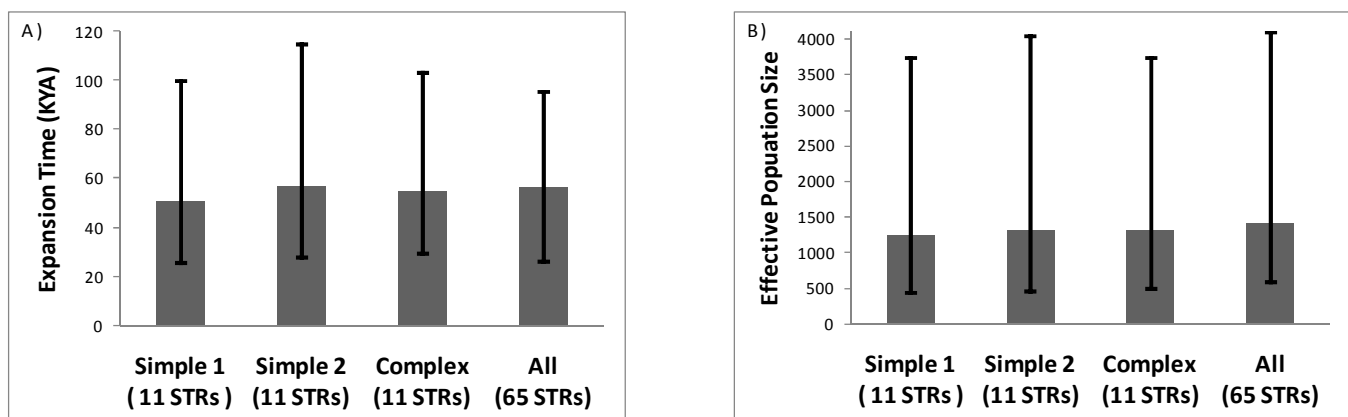

Figure S2: Effect of Y-STR properties and number on demographic inferences. The posterior estimates for expansion time and  $N_e$  are similar using different sets of 11 or 65 YSTRs in 77 sub-Saharan African males, and the 95% CIs are also similar for (A) Expansion time and (B) effective population size.

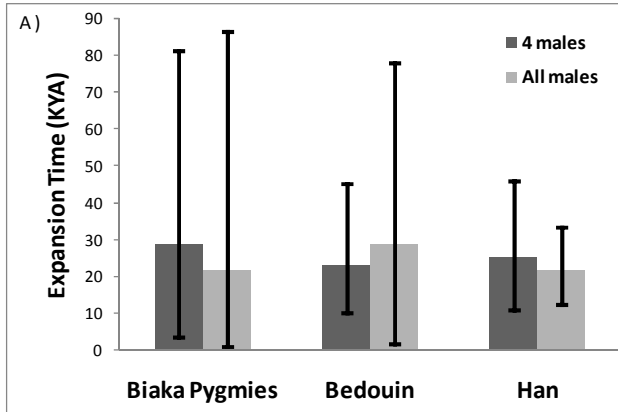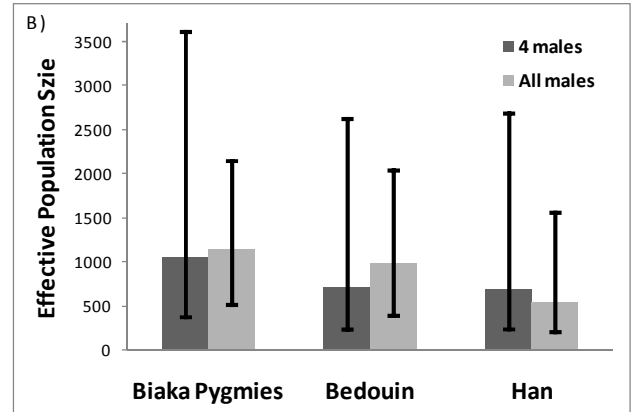

Figure S3: The effect of sample size on demographic inferences. Small sample sizes (4 males) gave similar median posterior estimates to larger sample size (20, 23 and 24 males). Larger sample sizes led to narrower 95% CIs for  $N_e$  but not for expansion time.

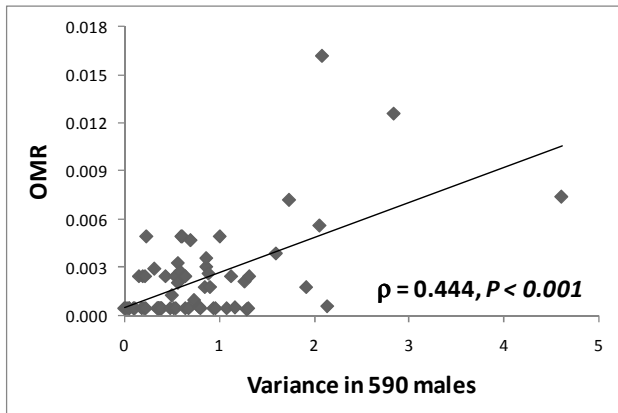

Figure S4: Correlation between observed mutation rate of each marker and its variance in the 590 individuals.

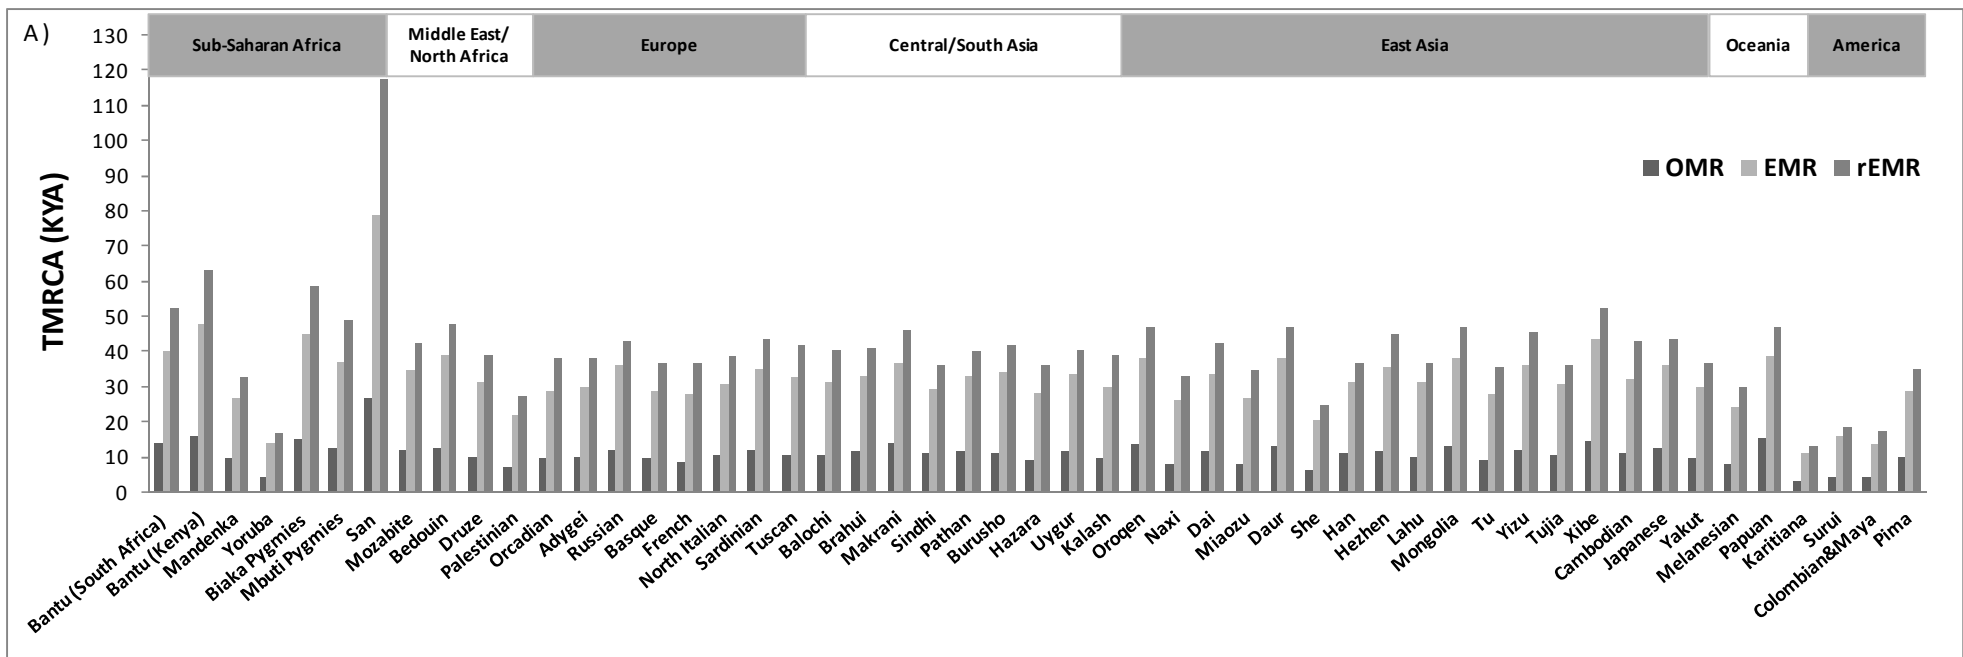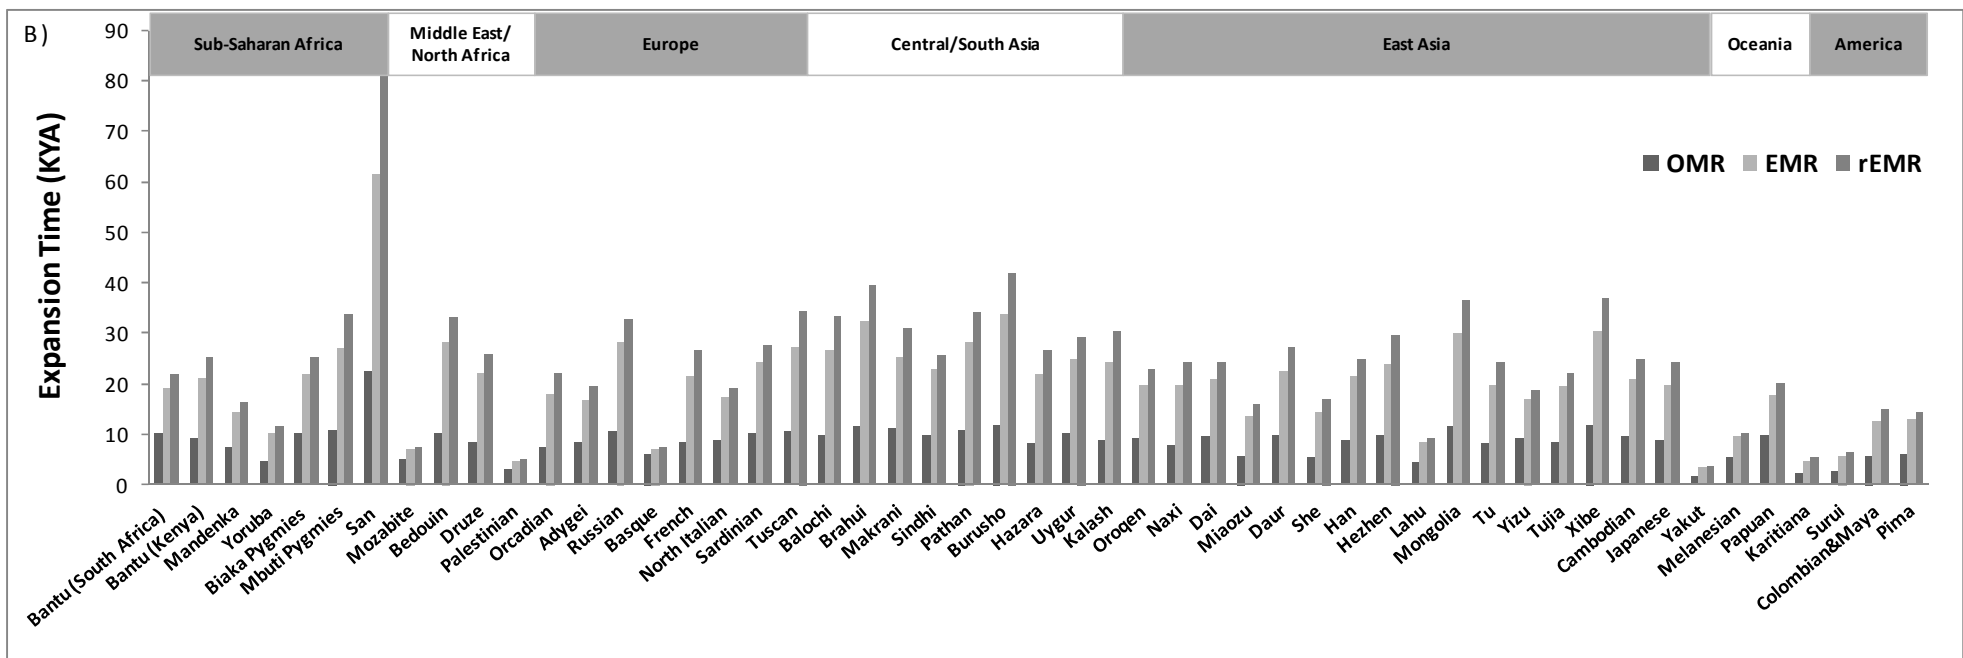

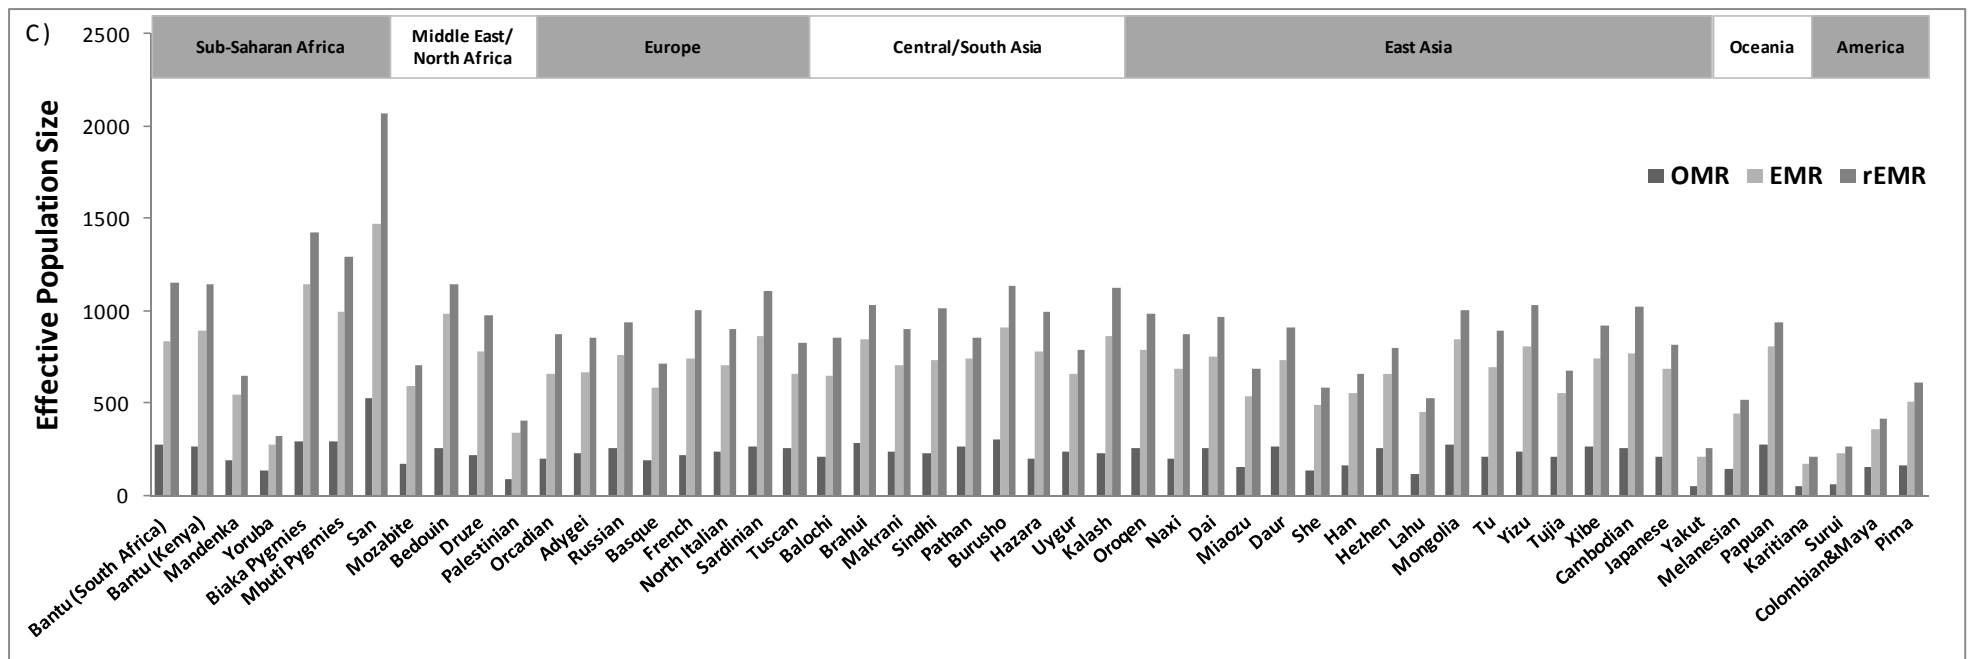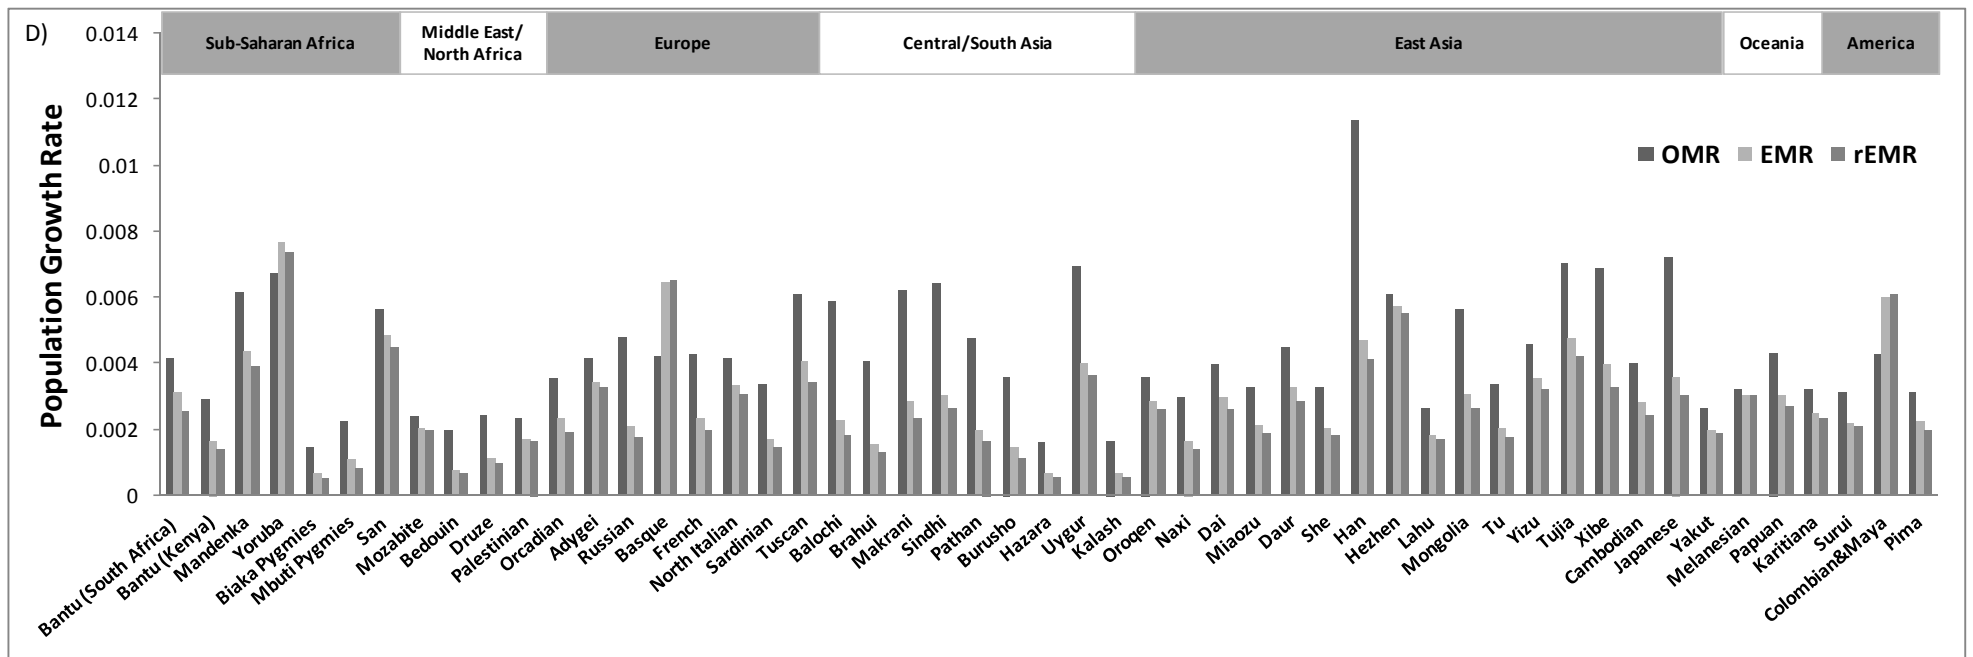

Figure S5: Median posterior estimates using three mutation rates. Bigger median values of (A) TMRCA , (B) Expansion time and (C)  $N_e$  were obtained when smaller mutation rates were applied, but the median values of (D) growth rate tended to become smaller when lower mutation rates were used.



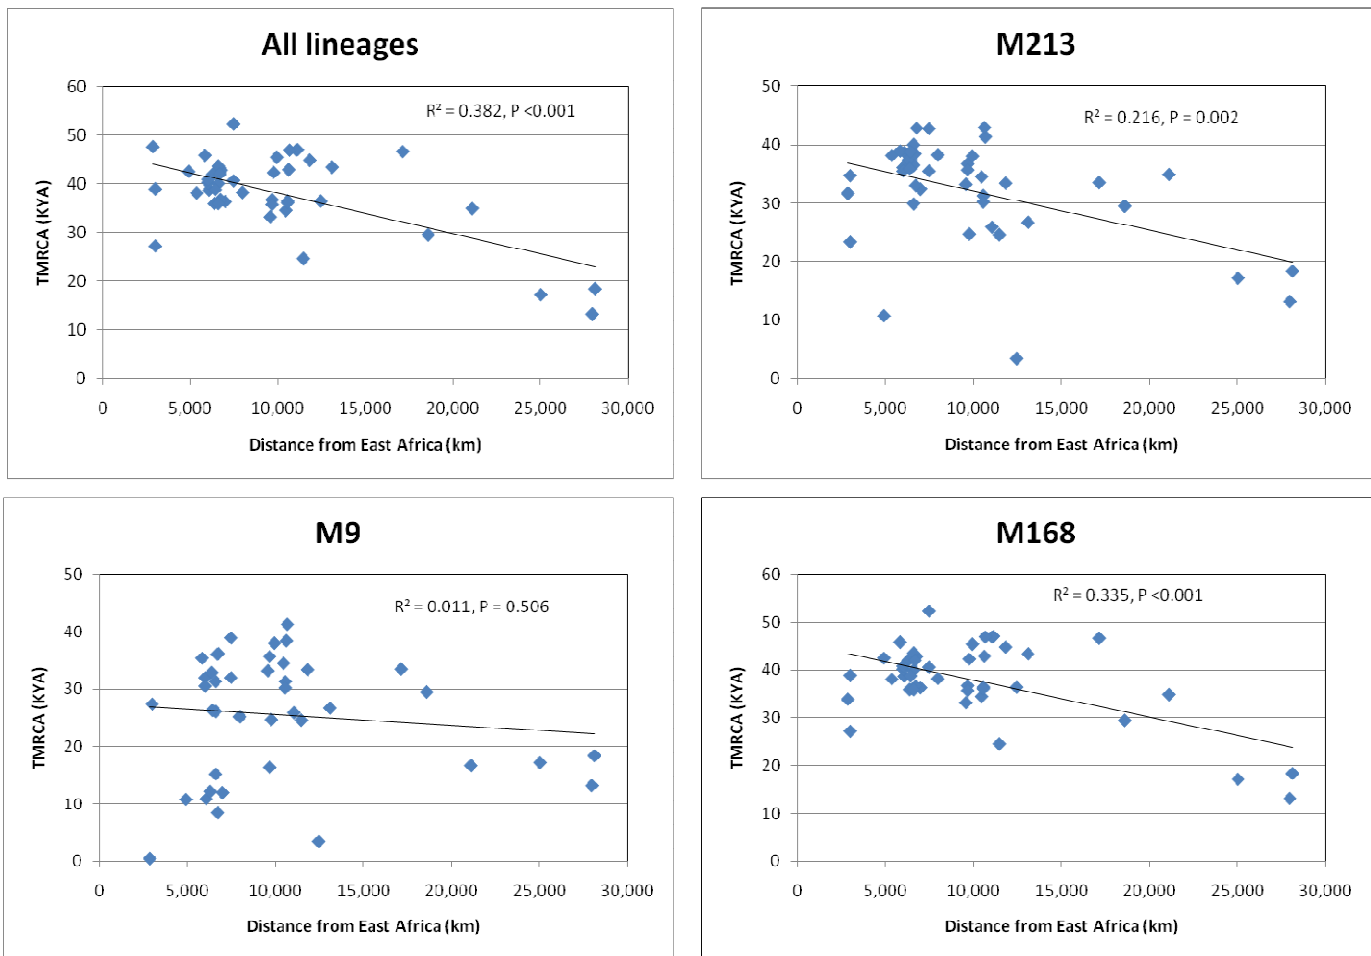

Figure S6. Correlation of TMRCA for specific lineages with walking distance from East Africa. Each point represents a population sample, and the lineage is shown at the top of the figure.

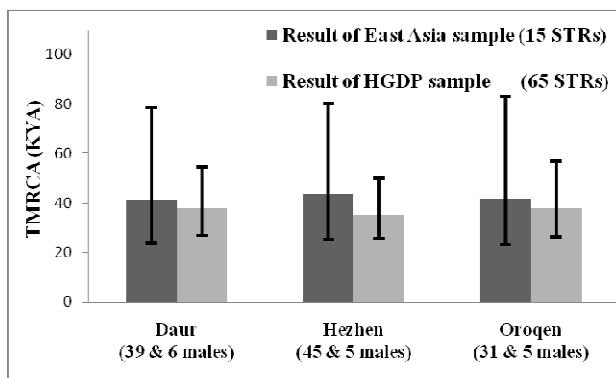

Figure S7: Comparison the TMRCA of three East Asian populations with TMRCA from the same populations reported by Xue et al (2006). Median estimates are similar, although 95% CIs are narrower when larger numbers of Y-STRs and smaller numbers of individuals are used.
